# Supplementary material
Source: Springer Nature journal article supplement (https://www.springermedizin.de/resource/supplementary/12913_2013_3033_MOESM3_ESM.pdf/9533354)

**Frequency of ward pharmacist visit**

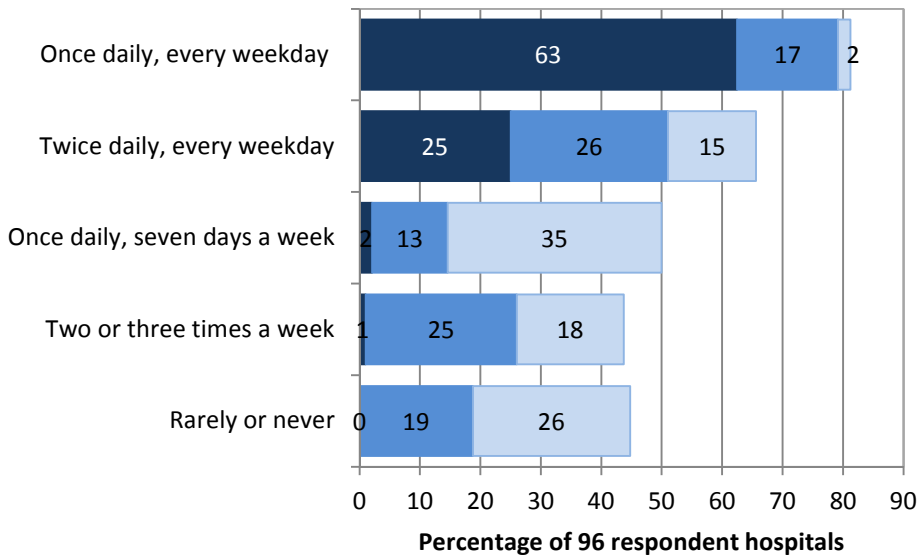

■ Majority of wards   ■ Some wards   ■ No ward

Supplement: MOESM3 [file 9533354]
